# Supplementary material
Source: ML conference proceedings conference paper supplement (https://proceedings.neurips.cc/paper_files/paper/2022/hash/8fcb27984bf16ca03cad643244ec470d-Abstract.html)
Supplement: Supplementary file 1 [file 8fcb27984bf16ca03cad643244ec470d-Supplemental-Conference.zip]

Archive with 2 entries (2 files):
- supplemental.pdf
- video.mp4
